# Supplementary material for: Upregulation of Leukemia Inhibitory Factor (LIF) during the Early Stage of Optic Nerve Regeneration in Zebrafish
Source: PubMed Central journal article supplement (PMC4146584; doi:10.1371/journal.pone.0106010), 2014-08-27
Supplement: pone.0106010.s005.pdf [file pone.0106010.s005.pdf]

**Table S1. Primers used for quantitative real-time PCR**

| Gene Name                   | Accession #    | Sequences (5' → 3')                                        | Product size (bp) | Efficiency (%) |
|-----------------------------|----------------|------------------------------------------------------------|-------------------|----------------|
| IL-6<br>( <i>il6</i> )      | NM_001261449.1 | Fw: GACATCCAGCACTTCCCTATCC<br>Rv: TTCCCTCTTTTCCCTCCTGCTC   | 138               | 95.5           |
| CNTF<br>( <i>cntf</i> )     | NM_001145632.1 | Fw: GCGACTGGTGGGAGTTTTG<br>Rv: AGCACCTCTTCTTGCCGTTG        | 150               | 94.7           |
| LIF<br>( <i>m17</i> )       | NM_001079833.1 | Fw: CAAGTCAAATTCAGAGCATACTTCG<br>Rv: TGAGCTTCAGACTTCGGTGAA | 121               | 95.5           |
| β-actin<br>( <i>actb1</i> ) | NM_131031.1    | Fw: CGCAAATACTCCGTCTGGAT<br>Rv: GCACTTCCTGTGAACGATGG       | 120               | 95.2           |

Fw: forward, Rv: reverse
