# Supplementary material for: Upregulation of Leukemia Inhibitory Factor (LIF) during the Early Stage of Optic Nerve Regeneration in Zebrafish
Source: PubMed Central journal article supplement (PMC4146584; doi:10.1371/journal.pone.0106010), 2014-08-27
Supplement: pone.0106010.s006.pdf [file pone.0106010.s006.pdf]

**Table S2. Primers used for qualitative PCR and in situ hybridization probe**

| Gene Name                  | Accession #    | Sequences (5'→3')                                    | Product size (bp) |
|----------------------------|----------------|------------------------------------------------------|-------------------|
| LIF<br>( <i>m17</i> )      | NM_001079833.1 | Fw: AGGAACATGCTCTGCCTGTC<br>Rv: AGCTGCTGAAGCCGAGTTAG | 578               |
| LIFR-A<br>( <i>lifra</i> ) | NM_001014306.1 | Fw: GTGTCCGTGTTTGCTCTGTC<br>Rv: GTCTTGGGGCTCGTCTGG   | 885               |
| LIFR-B<br>( <i>lifrb</i> ) | NM_001113732.1 | Fw: TTAGACCAGCAAAAAGGCATC<br>Rv: CACAGCAATGGGAAGTGG  | 753               |
| gp130<br>( <i>il6st</i> )  | NM_001113504.1 | Fw: TGCTGGAGTGGGTGAATG<br>Rv: TGATGGTTTGGGGTTTGG     | 949               |

Fw: forward, Rv: reverse
