# Supplementary material for: Upregulation of Leukemia Inhibitory Factor (LIF) during the Early Stage of Optic Nerve Regeneration in Zebrafish
Source: PubMed Central journal article supplement (PMC4146584; doi:10.1371/journal.pone.0106010), 2014-08-27
Supplement: pone.0106010.s007.pdf [file pone.0106010.s007.pdf]

**Table S3. Primary antibodies used in this study**

| <b>Protein Name</b>                     | <b>Type</b>       | <b>Supplier</b>                                     | <b>Catalog #</b> | <b>Dilution</b>           |
|-----------------------------------------|-------------------|-----------------------------------------------------|------------------|---------------------------|
| LIF                                     | mouse monoclonal  | Santa Cruz, CA, USA                                 | sc-80159         | 1:100 (WB)<br>1:50 (IHC)  |
| STAT3                                   | rabbit polyclonal | Santa Cruz                                          | sc-7179          | 1:300<br>(WB, IHC)        |
| phospho-STAT3<br>(pTyr <sup>708</sup> ) | mouse monoclonal  | Medical & Biological<br>Laboratories, Nagoya, Japan | D128-3           | 1:500 (WB)<br>1:300 (IHC) |
| Bcl-2                                   | rabbit polyclonal | Santa Cruz                                          | sc-492           | 1:200 (WB)                |
| active Caspase-3                        | rabbit polyclonal | BD Biosciences, CA, USA                             | #559565          | 1:500 (WB)<br>1:300 (IHC) |
| $\beta$ -actin                          | rabbit polyclonal | GeneTex, CA, USA                                    | GTX16039         | 1:500 (WB)                |
| $\beta$ III-tubulin<br>(Tuj1)           | rabbit monoclonal | Cell Signaling Technology, MA,<br>USA               | #5666            | 1:50 (IHC)                |
| GAP-43                                  | goat polyclonal   | Santa Cruz                                          | sc-17790         | 1:300<br>(WB, IHC)        |

WB: western blotting, IHC: immunohistochemistry
